# Supplementary material for: Hydrogen sulphide improves adaptation of Zea mays seedlings to iron deficiency
Source: PubMed Central journal article supplement (PMC4623679; doi:10.1093/jxb/erv368), 2015-07-23

**Title:** Hydrogen sulfide improves adaptation of *Zea mays* seedlings to iron deficiency

**Authors:** Juan Chen <sup>1,2</sup>, Fei-Hua Wu <sup>2,3</sup>, Yu-Ting Shang <sup>1</sup>, Wen-Hua Wang <sup>2</sup>, Wen-Jun Hu <sup>2</sup>, Martin Simon <sup>2</sup>, Xiang Liu <sup>2</sup>, Zhou-Ping Shangguan <sup>1</sup> and Hai-Lei Zheng <sup>2,\*</sup>

**Table S1** Sequences of forward and reverse primers used in qRT-PCR for gene expression analysis in maize seedlings.

| Gene name       | Full name                                        | Forward primer sequence (5' to 3') | Reverse primer sequence (5' to 3') |
|-----------------|--------------------------------------------------|------------------------------------|------------------------------------|
| <i>ZmMTN</i>    | S-adenosylhomocysteine nucleosidase              | ACATAACAAGCATCGGATCG               | GGATGAGGATTAGGTCTACA               |
| <i>ZmNAS1</i>   | nicotianamine synthase 1                         | CGCTGCTTACAGGAGTCCTA               | TATTATCAATGTTTAGCGAC               |
| <i>ZmNAS3</i>   | nicotianamine synthase 3                         | TGCGTACACCACATCTGTGC               | AATCGTACATCGAATCGAG                |
| <i>ZmDMAS1</i>  | deoxymugineic acid synthase 1                    | AGCTTCGAGAAGTGCTAGTC               | TTACGCACGGTGACGGGACG               |
| <i>ZmTOM1</i>   | transporter of MAs 1                             | GTGCCGTACTTAAATGTGAA               | ACGGAAGAAAGGTCCCCTAG               |
| <i>ZmTOM2</i>   | transporter of MAs 2                             | TACCTATCGCGGCTGCTTTG               | GCGGTCGTACGGCGCAAGAA               |
| <i>ZmTOM3</i>   | transporter of MAs 3                             | TGCGGACACTGACTTTCGTG               | TTGTTTTAGGAACCTGGATA               |
| <i>ZmNRAMP1</i> | natural resistance associated macrophage protein | TTGCTGGGGTACTAAACGAG               | CCTTGTCACGACATCTAGGT               |
| <i>ZmMATE2</i>  | multi-drug and toxin efflux 2                    | AGTTTCATCTTCGGATCCTC               | CCAATGTAAGTCTGGTTGA                |
| <i>ZmFRO1</i>   | ferric-chelate reductase 1                       | TTCGCTCTTCCAACCTCCAACCTTCTGT       | TTGATTACTTCTTCACCTGTAGCGTCT        |
| <i>ZmIBP</i>    | iron binding protein                             | AACGGCTGCCTCAGTGAAGAGAT            | CAAGCGATATGACGAGGTGATTCTGT         |
| <i>ZmIRT</i>    | iron-regulated transporter 1                     | CCACCGTGTTCATCGCTCAGGTTCTTG        | TAGACCCATGCCCTCGAACATTTGG          |
| <i>ZmYS1</i>    | yellow stripe 1                                  | CACGGAAATGGAGAATGCGAGATAC          | ACATAGGTTGAACCAACATGACAA           |
| <i>ZmST1</i>    | sulfate transporter 1                            | TTGGCAGACAATACTGATAGGAGCG          | ATTAGACTAGCTGAAGGTGGGTTGA          |
| <i>ZmATPS</i>   | ATP sulfurylase                                  | CCCAGAATCAACTGTTGTTGCGATC          | TCCCGTGGTCAGCATCATAGAGGT           |

|                 |                                                     |                             |                            |
|-----------------|-----------------------------------------------------|-----------------------------|----------------------------|
| <i>ZmAPR</i>    | adenosine 5'-phosphosulfate reductase               | GGCTCCGAAATCGCCATCGCCTTCAG  | TGCCGTAGTGCTTCTCCACCTTGTCG |
| <i>ZmOASTL1</i> | <i>O</i> -acetyl-L-serine(thiol)lyase 1             | TCACCCAGCTCATCGGCAACAC      | ACGCTACAGCAGGGCTCCATAATCT  |
| <i>ZmOASTL2</i> | <i>O</i> -acetyl-L-serine(thiol)lyase 2             | TCCAACCTCCGACGAGAACCGCCAC   | CGACGCACCCATCGGTACACCTTGTT |
| <i>ZmDES</i>    | Cys desulfhydrase                                   | TGAGATCCTGAGCTATGCTATGGTC   | GGAGGCTGCTTCTTTAGGCTTTGA   |
| <i>ZmRBCL</i>   | ribulose-1,5-bisphosphate carboxylase large subunit | ACCTATTTGAAGAGGGTTCTGTTAC   | GATACCGTGAGGCGGACCTTGGA    |
| <i>ZmRBCS</i>   | ribulose-1,5-bisphosphate carboxylase small subunit | GCAGTGCCTCAGCTTCATCGCCTACAA | TCGACAACATCAAGCAGACGCAGTG  |
| <i>Zmpsba</i>   | D1 protein                                          | TTTACATTGGATGGTTCGGTGTTTTGA | ATCTACTGGAGGAGCAGCGATGAAGG |
| <i>ZmPEPC</i>   | phosphoenolpyruvate carboxylase                     | CCATCTGCTGGCTTCTGGAGTTTC    | ACCAGGGAGAGCCCGAACGTGAAAA  |
| <i>Zmactin2</i> | actin 2                                             | TTGATTATGAACAGGAGCTGGAGACT  | AGCCACCACTGAGGACAACATTACC  |

---

**Table S2** Procedures of dsDNA synthesis used in qRT-PCR for gene expression analysis in leaves of maize plant.

| <b>Gene name</b> | <b>Procedures of dsDNA synthesis</b>                                               |
|------------------|------------------------------------------------------------------------------------|
| <i>ZmMTN</i>     | 10 min at 95 °C and 40 cycles of 95 °C for 30 s, 46 °C for 30 s and 72 °C for 20 s |
| <i>ZmNAS1</i>    | 10 min at 95 °C and 40 cycles of 95 °C for 30 s, 49 °C for 30 s and 72 °C for 20 s |
| <i>ZmNAS3</i>    | 10 min at 95 °C and 40 cycles of 95 °C for 30 s, 51 °C for 30 s and 72 °C for 20 s |
| <i>ZmDMAS1</i>   | 10 min at 95 °C and 40 cycles of 95 °C for 30 s, 56 °C for 30 s and 72 °C for 20 s |
| <i>ZmTOM1</i>    | 10 min at 95 °C and 40 cycles of 95 °C for 30 s, 61 °C for 30 s and 72 °C for 20 s |
| <i>ZmTOM2</i>    | 10 min at 95 °C and 40 cycles of 95 °C for 30 s, 53 °C for 30 s and 72 °C for 25 s |
| <i>ZmTOM3</i>    | 10 min at 95 °C and 40 cycles of 95 °C for 30 s, 52 °C for 30 s and 72 °C for 24 s |
| <i>ZmNRAMP1</i>  | 10 min at 95 °C and 40 cycles of 95 °C for 30 s, 51 °C for 30 s and 72 °C for 20 s |
| <i>ZmMATE2</i>   | 10 min at 95 °C and 40 cycles of 95 °C for 30 s, 59 °C for 30 s and 72 °C for 20 s |
| <i>ZmFRO1</i>    | 10 min at 95 °C and 40 cycles of 95 °C for 30 s, 52 °C for 30 s and 72 °C for 20 s |
| <i>ZmIBP</i>     | 10 min at 95 °C and 40 cycles of 95 °C for 30 s, 57 °C for 30 s and 72 °C for 20 s |
| <i>ZmIRT</i>     | 10 min at 95 °C and 40 cycles of 95 °C for 30 s, 54 °C for 30 s and 72 °C for 20 s |
| <i>ZmYS1</i>     | 10 min at 95 °C and 40 cycles of 95 °C for 30 s, 53 °C for 30 s and 72 °C for 20 s |
| <i>ZmST1</i>     | 10 min at 95 °C and 40 cycles of 95 °C for 30 s, 56 °C for 30 s and 72 °C for 20 s |
| <i>ZmATPS</i>    | 10 min at 95 °C and 40 cycles of 95 °C for 30 s, 55 °C for 30 s and 72 °C for 20 s |
| <i>ZmAPR</i>     | 10 min at 95 °C and 40 cycles of 95 °C for 30 s, 56 °C for 30 s and 72 °C for 20 s |
| <i>ZmOASTL1</i>  | 10 min at 95 °C and 40 cycles of 95 °C for 30 s, 58 °C for 30 s and 72 °C for 20 s |
| <i>ZmOASTL2</i>  | 10 min at 95 °C and 40 cycles of 95 °C for 30 s, 50 °C for 30 s and 72 °C for 20 s |
| <i>ZmDES</i>     | 10 min at 95 °C and 40 cycles of 95 °C for 30 s, 54 °C for 30 s and 72 °C for 20 s |
| <i>ZmRBCL</i>    | 10 min at 95 °C and 40 cycles of 95 °C for 30 s, 60 °C for 30 s and 72 °C for 20 s |
| <i>ZmRBCS</i>    | 10 min at 95 °C and 40 cycles of 95 °C for 30 s, 55 °C for 30 s and 72 °C for 25 s |
| <i>Zmpsba</i>    | 10 min at 95 °C and 40 cycles of 95 °C for 30 s, 50 °C for 30 s and 72 °C for 24 s |
| <i>ZmPEPC</i>    | 10 min at 95 °C and 40 cycles of 95 °C for 30 s, 57 °C for 30 s and 72 °C for 20 s |
| <i>Zmactin2</i>  | 10 min at 95 °C and 40 cycles of 95 °C for 30 s, 55 °C for 30 s and 72 °C for 20 s |

**Table S3** Transmission electron microscopy analysis for the effect of NaHS on the numbers of grana stacks and grana lamellae in mesophyll cell chloroplast ultrastructure of maize leaves. Maize seedlings were pre-treated with 100  $\mu\text{M}$  NaHS for 8 d and then grown in a nutrient solution containing 1  $\mu\text{M}$  Fe(III)-EDTA or 50  $\mu\text{M}$  Fe(III)-EDTA for 12 d. Data are presented as means  $\pm$  SE. Different letters in line indicate significant differences at  $P < 0.05$  from different treatments. -Fe+NaHS: seedlings were pre-treated with 100  $\mu\text{M}$  NaHS and then treated with 1  $\mu\text{M}$  Fe; +Fe: 50  $\mu\text{M}$  Fe; +Fe+NaHS: seedlings were pre-treated with 100  $\mu\text{M}$  NaHS and then treated with 50  $\mu\text{M}$  Fe.

| <b>Variables</b>                  | <b>-Fe</b>       | <b>-Fe+NaHS</b>  | <b>+Fe</b>       | <b>+Fe+NaHS</b>  |
|-----------------------------------|------------------|------------------|------------------|------------------|
| Grana stacks (number/chloroplast) | 18.8 $\pm$ 2.1 a | 23.9 $\pm$ 2.0 b | 35.4 $\pm$ 5.6 c | 51.9 $\pm$ 3.2 d |
| Grana lamellae (number/grana)     | 3.6 $\pm$ 1.2 a  | 6.5 $\pm$ 0.9 b  | 10.1 $\pm$ 2.1 c | 19.2 $\pm$ 2.0 d |

**Figure S1** Effect of NaHS on biomass of iron-deficient maize plants during the period of growth.

Maize seedlings were pre-treated with 100  $\mu\text{M}$  NaHS for 8 d and then grown in a nutrient solution containing 1  $\mu\text{M}$  Fe(III)-EDTA ( $-\text{Fe}$ ) for 50 d. Data are presented as means  $\pm$  SE.

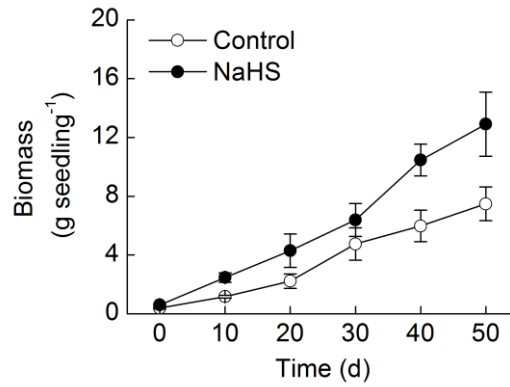

**Figure S2** Time-dependent gene expression of *ZmYS1* in iron-deficiency maize roots after NaHS

treatment. Maize seedlings were pre-treated with 100  $\mu\text{M}$  NaHS for 8 d and then grown in a nutrient solution containing 1  $\mu\text{M}$  Fe(III)-EDTA ( $-\text{Fe}$ ) for 12 d. Data are presented as means  $\pm$  SE.

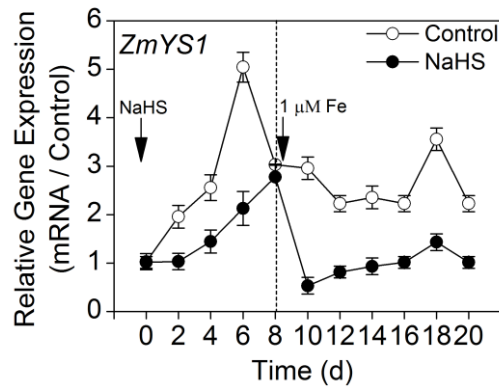

Supplement: supp_erv368_jexbot150672_file001.pdf [file supp_erv368_jexbot150672_file001.pdf]
